# Supplementary material for: Si-based agent alleviated small bowel ischemia–reperfusion injury through antioxidant effects
Source: Springer Nature journal article supplement (doi:10.1038/s41598-024-54542-7), 2024-02-20
Supplement: 41598_2024_54542_MOESM1_ESM.pdf [file 41598_2024_54542_MOESM1_ESM.pdf]

**MDA**

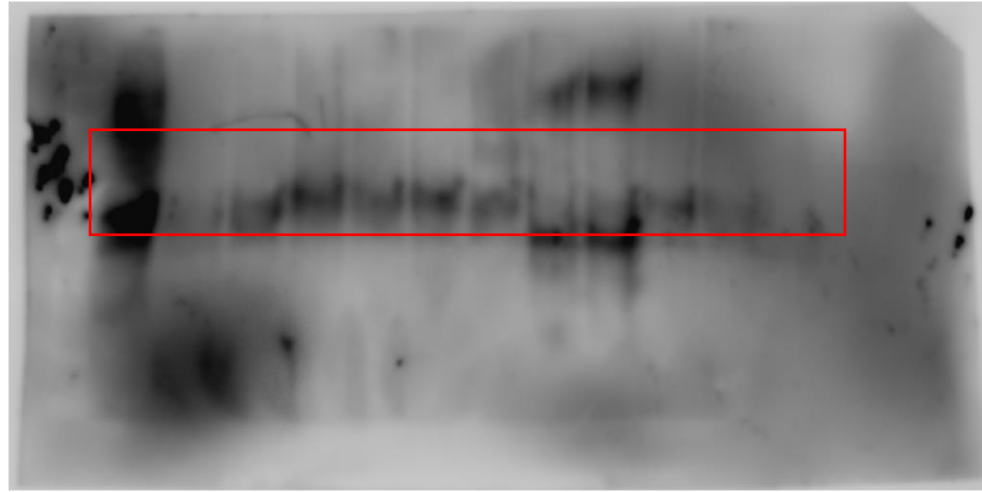

**$\beta$ -actin**

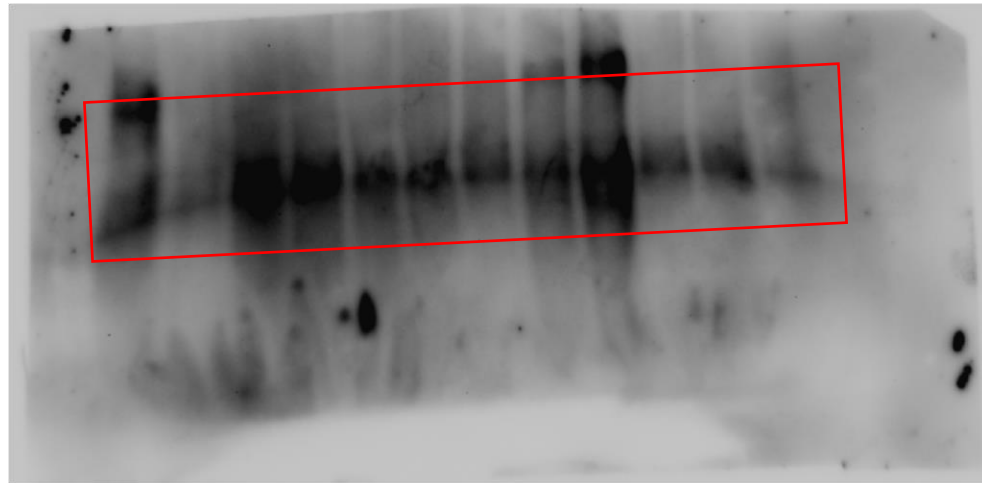

**Overall photo of Western blotting gel in Figure 4a**

MDA and  $\beta$  actin are run on different gels.

Red squares: the area used in Figure 4a
